# Supplementary material for: Design of multifunctional FePt/GO nanocomposites for targeting, dual-modal imaging diagnostic and in situ therapeutic potential theranostic platform
Source: Royal Society of Chemistry journal article supplement (doi:10.1039/c4ra11589a), 2014-01-01
Supplement: c4ra11589a1.pdf [file c4ra11589a1.pdf]

## Supporting Information

Design of Multifunctional FePt/GO Nanocomposites for Targeting, Dual-Modal  
Imaging Diagnostic and in situ Therapeutic Potential Theranostic Platform

Xiuwen Zheng<sup>\*a,b</sup>, Weihong Chen<sup>a,b</sup>, Ping Cui,<sup>a</sup> Zhiming Wang,<sup>a</sup> Wei  
Zhang<sup>a,b</sup>

<sup>a</sup>School of Chemistry & Chemical Engineering, Linyi University,

<sup>b</sup>Shandong provincial Key Laboratory of Detection Technology for  
Tumor Markers, Linyi University

Linyi, Shandong, 276000, P.R.China

Tel (Fax):+86-539-8766600

\* Corresponding author E-mail: xwzheng1976@gmail.com

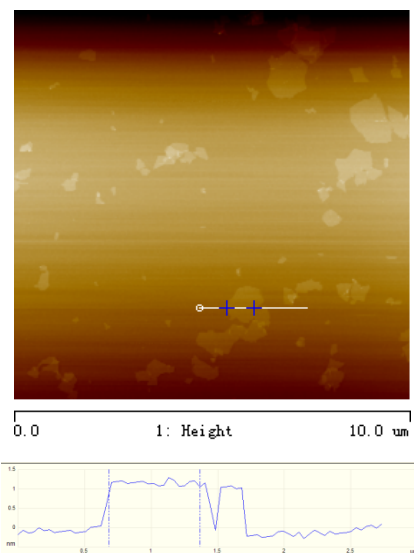

Figure S1. AFM images of GO sheets

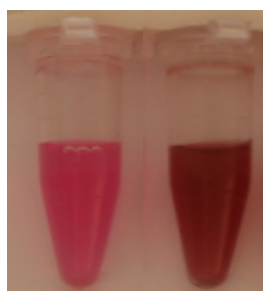

FigureS 2. Photographs of control (left), the FePt/GO-PEG-FA-FITC (right) dispersed in the DMEM medium with 10% fetal bovine serum, respectively. Photos were taken after the samples were prepared and stored at ambient condition for two weeks

| Dose<br>( $\mu\text{g mL}^{-1}$ ) | DCF fluorescence intensity |
|-----------------------------------|----------------------------|
| 0                                 | 14.66 $\pm$ 0.86           |
| 20                                | 17.58 $\pm$ 1.88*          |
| 60                                | 33.33 $\pm$ 3.07*          |
| 100                               | 40.71 $\pm$ 2.20*          |

\*P < 0.05, vs 0  $\mu\text{g}/\text{Ml}$

Figure S3. Table 1. Effect of FePt/GO-PEG NPs on intracellular ROS levels in MCF-7 cells after 6 h (n=3)
